# Supplementary material for: Combining OpenStreetMap mapping and route optimization algorithms to inform the delivery of community health interventions at the last mile
Source: PubMed Central journal article supplement (PMC11542841; doi:10.1371/journal.pdig.0000621), 2024-11-07

# By Fokontany (N=195)

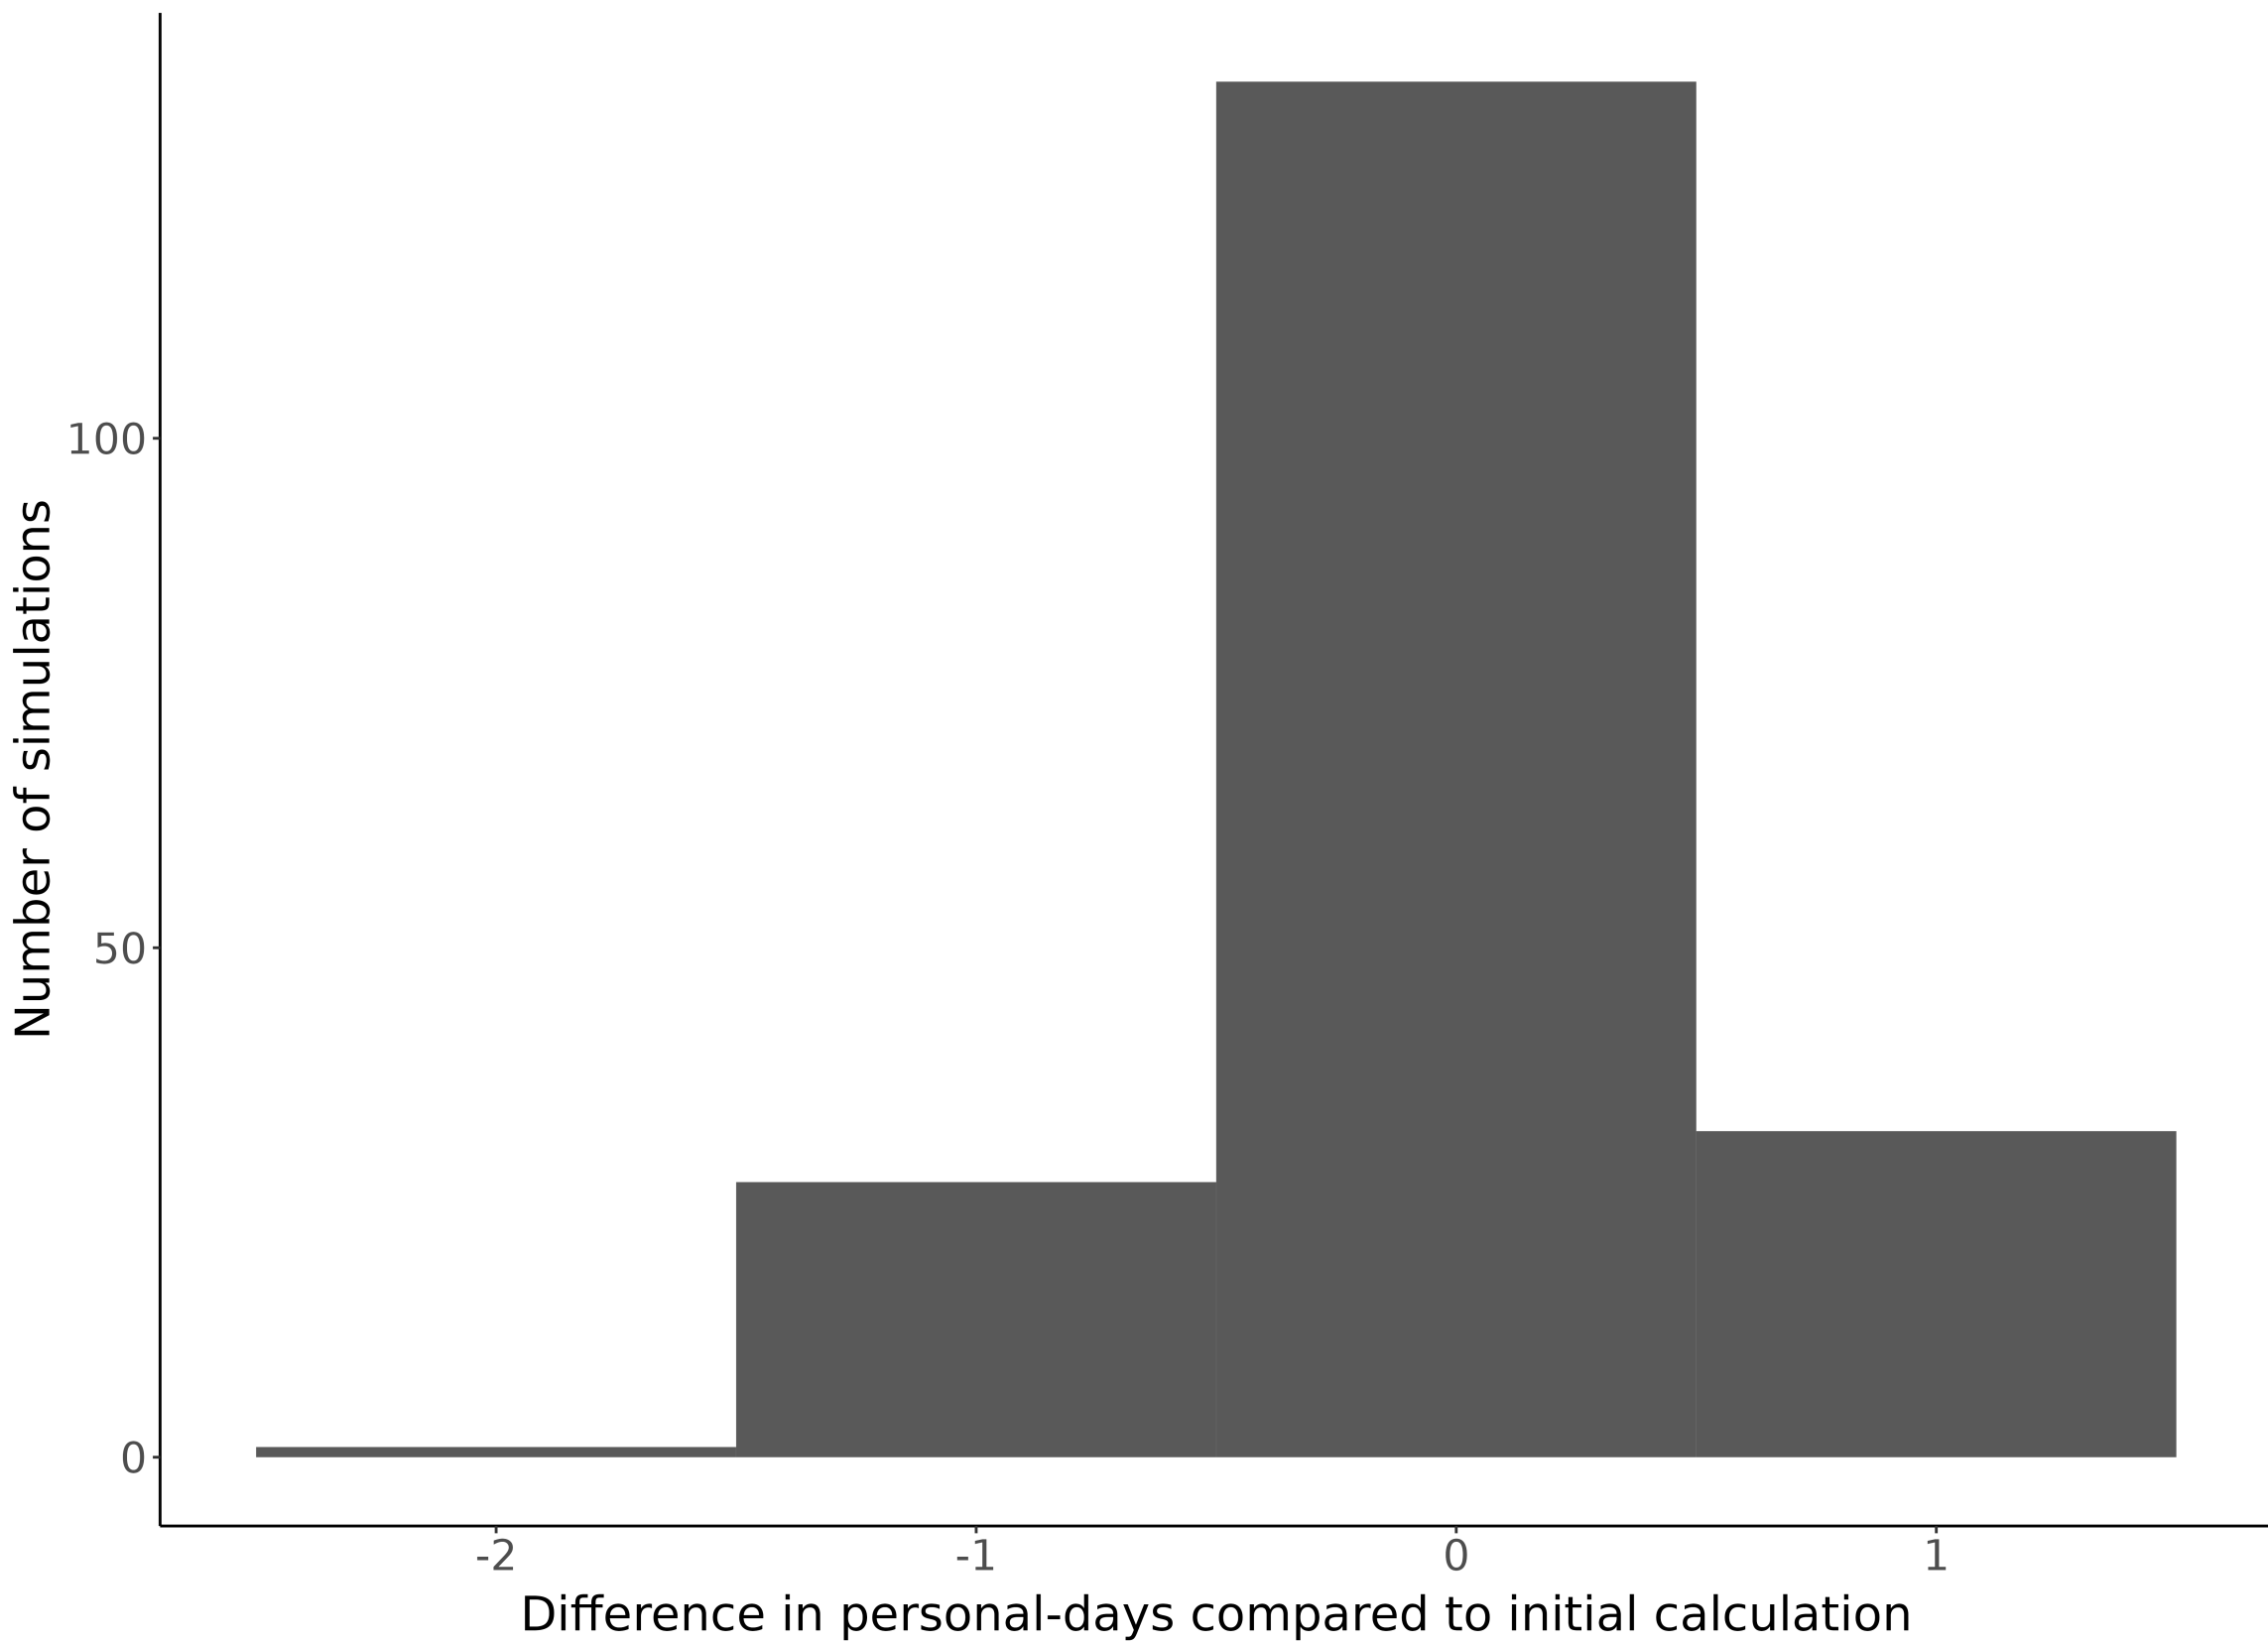

Supplement: pdig.0000621.s003.pdf [file pdig.0000621.s003.pdf]
