# Supplementary material for: Combining OpenStreetMap mapping and route optimization algorithms to inform the delivery of community health interventions at the last mile
Source: PubMed Central journal article supplement (PMC11542841; doi:10.1371/journal.pdig.0000621), 2024-11-07

# Ifanadiana District (Min = 1490 to Max = 1520 personnel days)

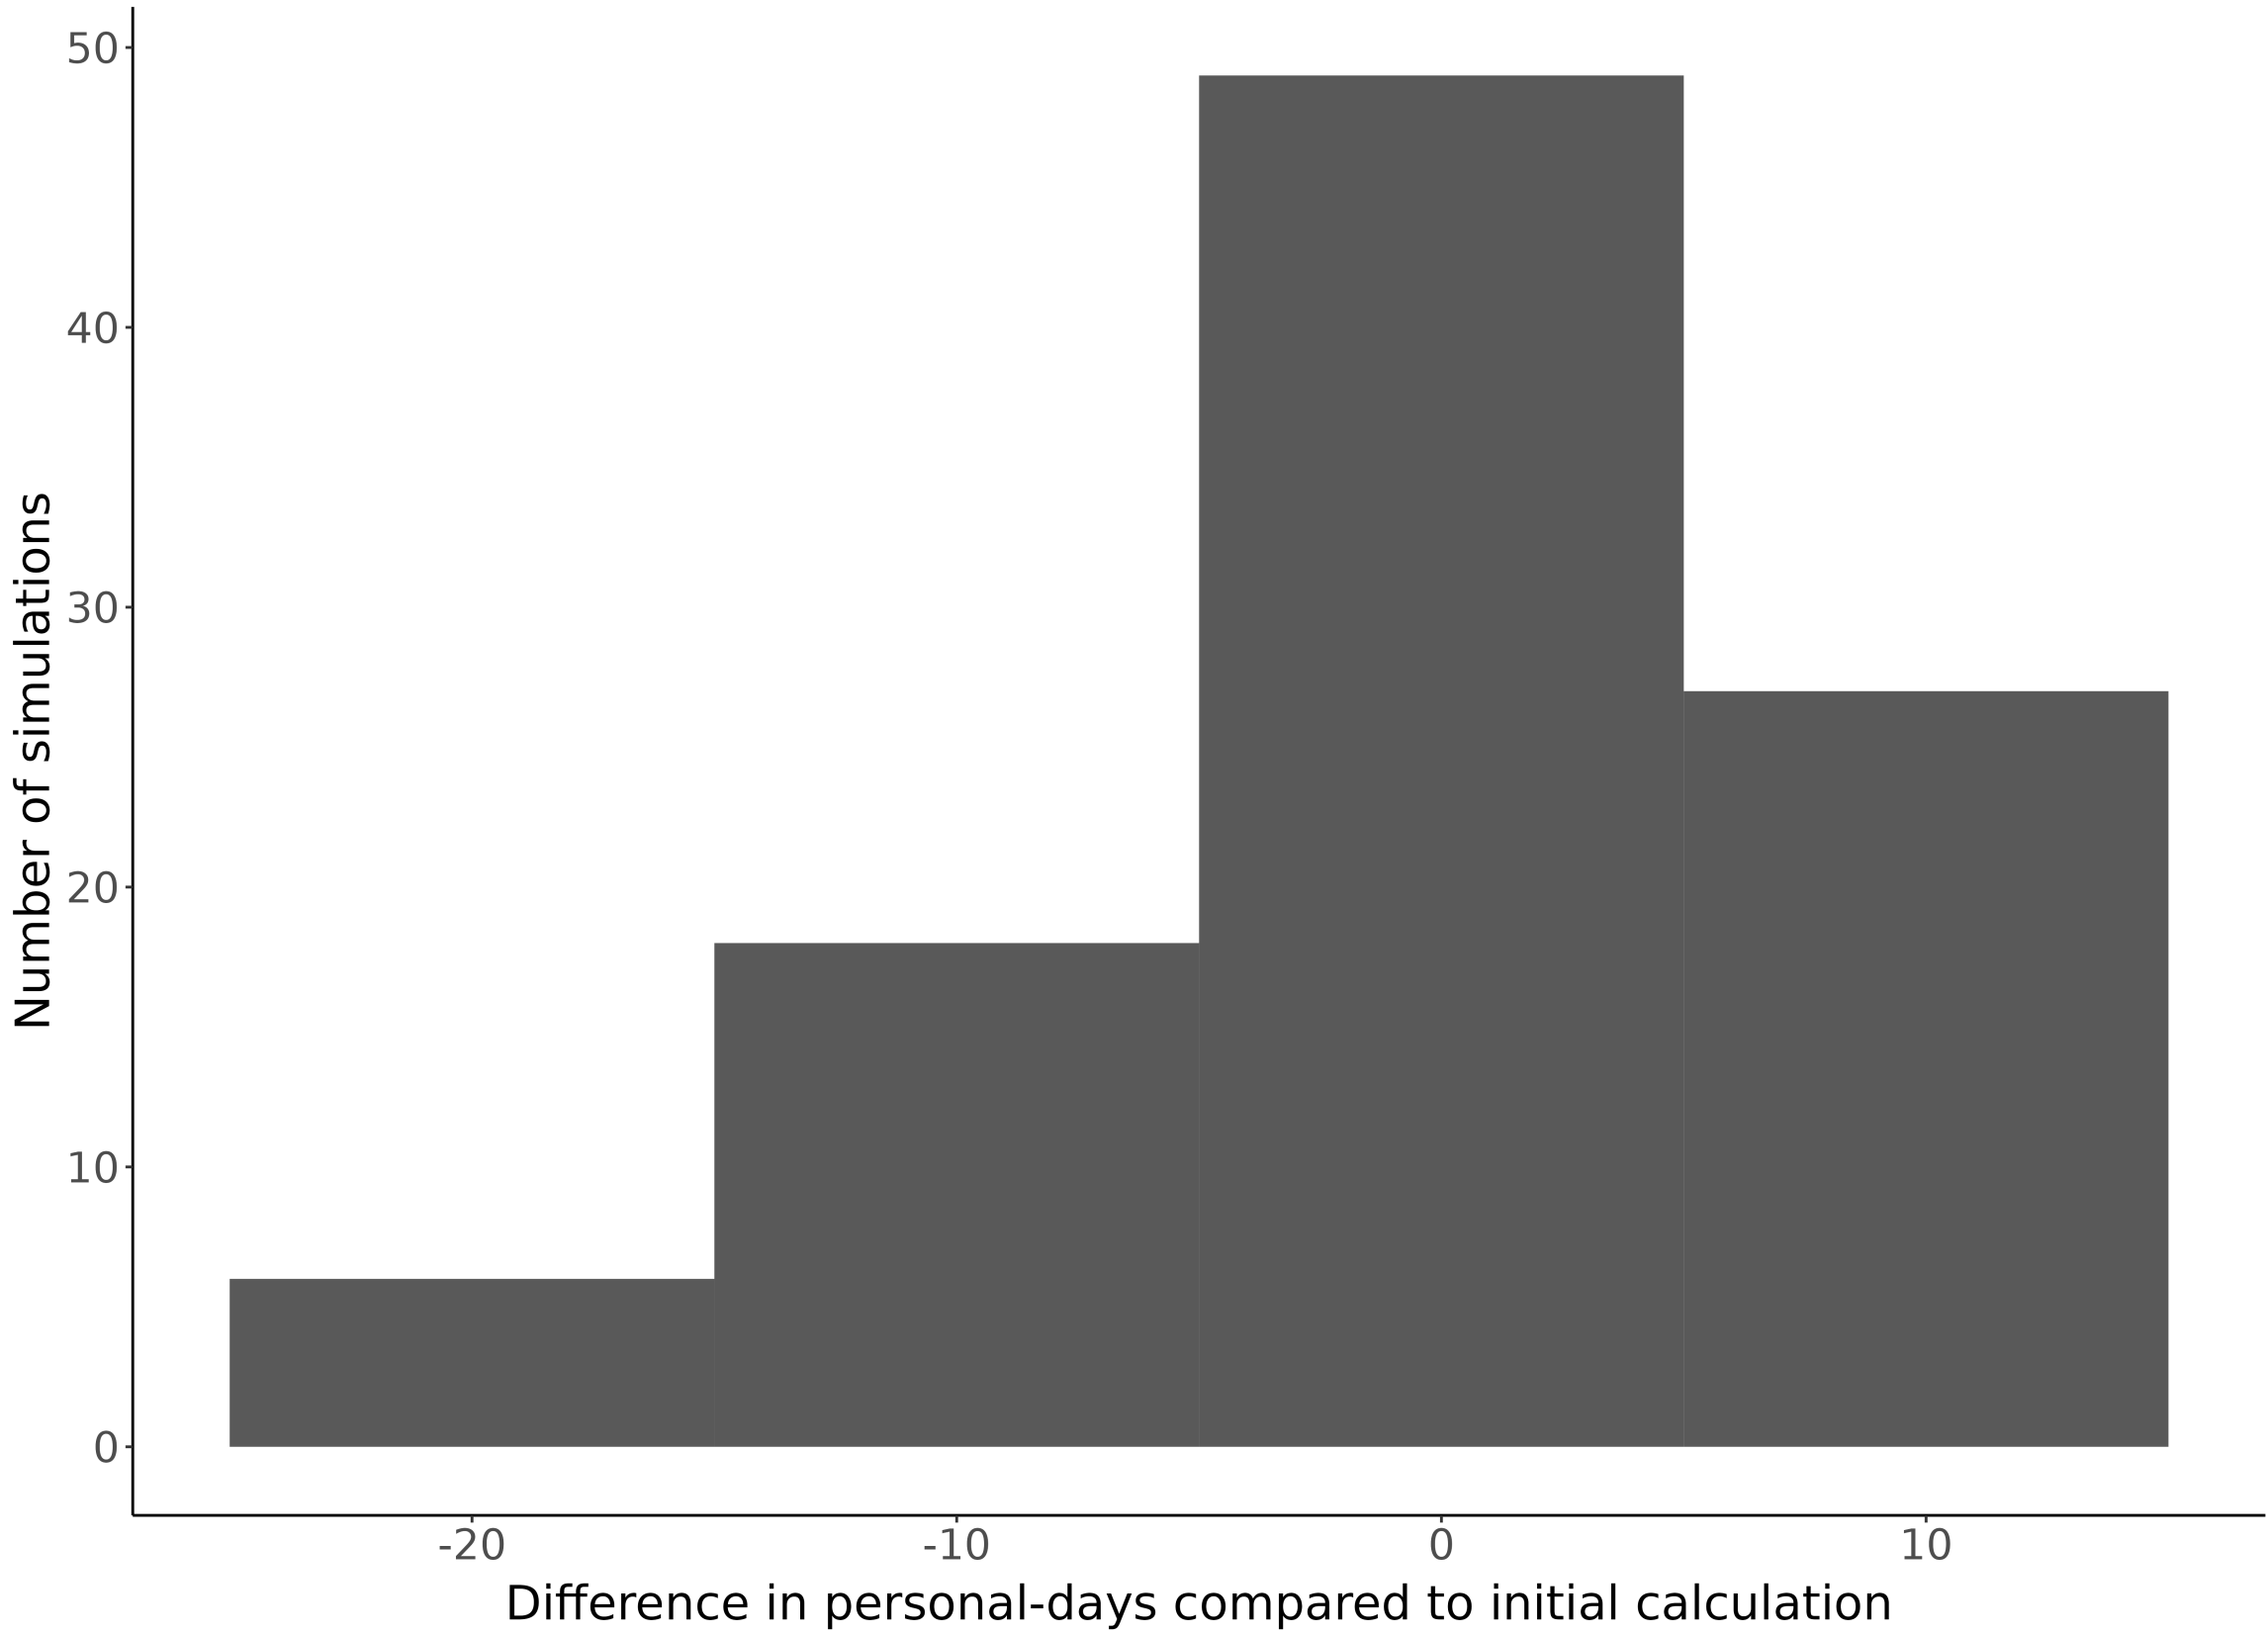

Supplement: pdig.0000621.s004.pdf [file pdig.0000621.s004.pdf]
