# Supplementary material for: Combining OpenStreetMap mapping and route optimization algorithms to inform the delivery of community health interventions at the last mile
Source: PubMed Central journal article supplement (PMC11542841; doi:10.1371/journal.pdig.0000621), 2024-11-07
Supplement: pdig.0000621.s005.pdf [file pdig.0000621.s005.pdf]

| Commune            | Number of buildings | Travel distance (km) | Travel duration (h) | Personnel -Day | Personnel -Month |
|--------------------|---------------------|----------------------|---------------------|----------------|------------------|
| Ambiabe            | 3,583               | 1,767                | 1,222               | 163            | 11               |
| Ambohimanga Du Sud | 13,050              | 4,107                | 3,987               | 533            | 37               |
| Ambohimiera        | 11,511              | 4,759                | 3,746               | 501            | 34               |
| Ampasinambo        | 2,975               | 487                  | 400                 | 56             | 5                |
| Analampasina       | 5,199               | 2,186                | 1,700               | 227            | 14               |
| Androrangavola     | 8,519               | 3,433                | 2,756               | 368            | 27               |
| Antaretra          | 4,636               | 1,524                | 1,430               | 193            | 15               |
| Antsindra          | 5,422               | 2,669                | 1,851               | 245            | 15               |
| Fasintsara         | 5,136               | 1,640                | 1,574               | 218            | 19               |
| Ifanadiana         | 7,478               | 3,796                | 2,574               | 339            | 20               |
| Kelilalina         | 5,347               | 2,000                | 1,697               | 229            | 18               |
| Maroharatra        | 9,032               | 3,582                | 2,906               | 393            | 26               |
| Marotoko           | 5,370               | 2,244                | 1,753               | 235            | 17               |
| Ranomafana         | 4,182               | 1,797                | 1,372               | 184            | 13               |
| Tsaratanana        | 16,488              | 8,505                | 5,706               | 755            | 48               |
| <b>Total</b>       | <b>107,928</b>      | <b>44,496</b>        | <b>34,674</b>       | <b>4,639</b>   | <b>319</b>       |
