# Supplementary material for: Combining OpenStreetMap mapping and route optimization algorithms to inform the delivery of community health interventions at the last mile
Source: PubMed Central journal article supplement (PMC11542841; doi:10.1371/journal.pdig.0000621), 2024-11-07
Supplement: pdig.0000621.s006.pdf [file pdig.0000621.s006.pdf]

| Commune            | Number of households | Visit - once per month |            | Visit - twice per month |            | Visit - four times per month |            |
|--------------------|----------------------|------------------------|------------|-------------------------|------------|------------------------------|------------|
|                    |                      | Personnel              |            | Personnel               |            | Personnel                    |            |
|                    |                      | Day (Ref)              | Month      | Day                     | Month      | Day                          | Month      |
| Ambiabe            | 1,433                | 55                     | 7          | 110                     | 8          | 220                          | 12         |
| Ambohimanga Du Sud | 5,221                | 171                    | 23         | 342                     | 27         | 684                          | 45         |
| Ambohimiera        | 4,604                | 163                    | 21         | 326                     | 27         | 652                          | 41         |
| Ampasinambo        | 496                  | 19                     | 5          | 38                      | 5          | 76                           | 5          |
| Analampasina       | 2,081                | 73                     | 9          | 146                     | 11         | 292                          | 18         |
| Androrangavola     | 3,406                | 119                    | 15         | 238                     | 18         | 476                          | 31         |
| Antaretra          | 1,855                | 60                     | 10         | 120                     | 10         | 240                          | 15         |
| Antsindra          | 2,168                | 81                     | 7          | 162                     | 12         | 324                          | 20         |
| Fasintsara         | 2,054                | 77                     | 16         | 154                     | 17         | 308                          | 22         |
| Ifanadiana         | 2,993                | 112                    | 10         | 224                     | 16         | 448                          | 27         |
| Kelilalina         | 2,138                | 72                     | 12         | 144                     | 14         | 288                          | 20         |
| Maroharatra        | 3,616                | 129                    | 19         | 258                     | 23         | 516                          | 34         |
| Marotoko           | 2,147                | 76                     | 10         | 152                     | 12         | 304                          | 18         |
| Ranomafana         | 1,673                | 60                     | 8          | 120                     | 10         | 240                          | 14         |
| Tsaratana          | 6,596                | 241                    | 24         | 482                     | 34         | 964                          | 57         |
| <b>Total</b>       | <b>42,481</b>        | <b>1,508</b>           | <b>196</b> | <b>3,016</b>            | <b>244</b> | <b>6,032</b>                 | <b>379</b> |
