# Supplementary material for: Combining OpenStreetMap mapping and route optimization algorithms to inform the delivery of community health interventions at the last mile
Source: PubMed Central journal article supplement (PMC11542841; doi:10.1371/journal.pdig.0000621), 2024-11-07
Supplement: pdig.0000621.s007.pdf [file pdig.0000621.s007.pdf]

|                                                |                            | Difference between resampled and initial estimate |                               |                               |
|------------------------------------------------|----------------------------|---------------------------------------------------|-------------------------------|-------------------------------|
| Initial estimate of<br>personnel-days required | Number of<br>fokontany (%) | Personnel – days required per fokontany           |                               |                               |
|                                                |                            | Used in manuscript<br>(1 visit per month)         | Minimum of 100<br>simulations | Maximum of 100<br>simulations |
| [0,5]                                          | 74 (38.0%)                 | 4                                                 | -1                            | +1                            |
| (5,10]                                         | 73 (37.4%)                 | 8                                                 | -1                            | +1                            |
| (10,15]                                        | 34 (17.4%)                 | 13                                                | -2                            | +1                            |
| (15,20]                                        | 10 (5.1%)                  | 18                                                | -1                            | +1                            |
| > 20                                           | 4 (2.1%)                   | 23                                                | 0                             | +1                            |
|                                                |                            |                                                   |                               |                               |
| <i>Total district</i>                          | <i>195 (100%)</i>          | <i>1,508</i>                                      | <i>-18</i>                    | <i>12</i>                     |
